# Supplementary material for: Relationships between environmental variables and spatial and temporal distribution of jack mackerel (Trachurus japonicus) in the Beibu Gulf, South China Sea
Source: PeerJ. 2021 Nov 4;9:e12337. doi: 10.7717/peerj.12337 (PMC8572524; doi:10.7717/peerj.12337)
Supplement: Supplemental Information 1 [file peerj-09-12337-s001.xls]

## Sheet: raw_data
Year	Month	Lon	Lat	CPUE	SLA	SSS	SST	Chla	Depth	Distance
2013	11	108.25	21.33	0	0.176035	30.6142	22.9349	2.3688	-11	19320.6
2013	11	108.75	21.33	0	0.240479	30.4582	22.9762	4.70726	-17	30228.2
2013	11	109.05	21.33	0	0.280945	30.3956	23.2585	5.30898	-11	11520
2013	11	108.5	21	0	0.207443	30.8466	24.0797	1.36207	-34	61561.8
2013	11	109	21	0.995764	0.274327	30.4068	24.1521	3.98755	-22	10269.4
2013	11	109.5	21	0	0.30825	30.6457	23.6344	3.66509	-12	18586.3
2013	11	108.25	20.67	41.6538	0.185397	31.2179	24.4354	1.00688	-40	56416.9
2013	11	108.75	20.58	13.5574	0.238212	30.6237	24.6315	1.35031	-42	60764.7
2013	11	109.2	20.67	0.514245	0.285417	30.3812	24.201	3.08547	-19	40225.7
2013	11	108.25	20.22	60.4237	0.192115	31.2361	24.9056	1.28454	-50	95427.6
2013	11	108.67	20.13	586.052	0.215766	31.2344	25.0005	1.25672	-50	63205.5
2013	11	109.17	20.25	0	0.272413	31.3657	24.6866	2.58047	-19	38942.9
2013	11	107.75	19.82	11.6874	0.184861	32.8057	25.255	0.820722	-43	109536
2013	11	108.1	19.75	20.1023	0.191409	32.3237	25.1498	1.02117	-51	74059.8
2013	11	108.67	19.75	614.99	0.201647	31.5151	25.2038	1.40203	-60	37499.3
2013	11	108.83	19.75	0	0.211684	31.5659	24.9498	1.39157	-45	25235.8
2013	11	107.2	19.25	7.47992	0.170821	33.1967	25.5409	0.240414	-57	127213
2013	11	107.72	19.25	0.237581	0.174579	33.1288	26.1222	0.227878	-68	94842.1
2013	11	108.22	19.25	3.27246	0.194808	32.33	25.9645	2.07215	-37	42310.4
2013	11	107.2	18.75	20.5698	0.189347	33.2298	26.1183	0.40186	-69	106501
2013	11	107.78	18.8	0	0.171211	33.1423	26.9034	0.698765	-67	89112
2013	11	108.15	18.8	0.687218	0.190726	32.9546	26.7972	1.7907	-45	50242.8
2013	11	107.3	18.27	5.14245	0.201641	33.2422	26.2641	0.164578	-65	89386.6
2013	11	107.78	18.27	29.9197	0.186674	33.2362	26.6375	0.205141	-75	99156.1
2013	11	108.1	18.27	12.6224	0.195296	33.1757	26.595	0.334654	-83	67502.4
2014	2	108.25	21.33	0.060774	0.0676849	31.839	15.923	1.73138	-11	19320.6
2014	2	108.75	21.33	1.5259	0.118739	31.8242	17.8587	1.76054	-17	30228.2
2014	2	109.05	21.33	0	0.14147	31.7815	18.3294	1.82028	-11	11520
2014	2	108.5	21	0	0.0835505	32.0088	19.087	0.869352	-34	61561.8
2014	2	109	21	0	0.121511	31.8947	18.9378	1.78986	-22	10269.4
2014	2	109.5	21	0	0.139313	31.7697	18.2057	3.13219	-12	18586.3
2014	2	108.25	20.67	0	0.0601994	32.3254	19.6116	0.789009	-40	56416.9
2014	2	108.75	20.58	0	0.0894713	32.5174	19.7851	0.667785	-42	60764.7
2014	2	109.2	20.67	0	0.10776	32.1175	19.1597	2.71357	-19	40225.7
2014	2	108.25	20.22	0	0.0498787	32.6984	19.922	0.370123	-50	95427.6
2014	2	108.67	20.13	0.327247	0.0707774	32.6112	20.1326	0.447154	-50	63205.5
2014	2	109.17	20.25	0	0.0852979	32.4824	19.2918	3.38496	-19	38942.9
2014	2	107.75	19.82	1.12199	0.0417975	33.0868	20.6049	0.442368	-43	109536
2014	2	108.1	19.75	1.63623	0.0386259	32.9622	20.9229	0.439887	-51	74059.8
2014	2	108.67	19.75	10.2849	0.0627703	32.7593	20.6527	0.469478	-60	37499.3
2014	2	108.83	19.75	1.13134	0.067207	32.7889	20.0534	0.817281	-45	25235.8
2014	2	107.2	19.25	0	0.0516075	33.4628	20.6048	0.40193	-57	127213
2014	2	107.72	19.25	0	0.0439887	33.4202	21.6526	0.471703	-68	94842.1
2014	2	108.22	19.25	0	0.0357465	32.9701	22.1891	0.941403	-37	42310.4
2014	2	107.2	18.75	0	0.0597491	33.1317	21.1005	0.389131	-69	106501
2014	2	107.78	18.8	0.860191	0.0461225	33.4176	22.3662	0.565426	-67	89112
2014	2	108.15	18.8	0	0.0367744	33.233	22.3616	1.09675	-45	50242.8
2014	2	107.3	18.27	0	0.06174	32.7882	22.1709	0.474179	-65	89386.6
2014	2	107.78	18.27	0	0.050014	33.322	22.4578	0.816221	-75	99156.1
2014	2	108.1	18.27	0	0.0373103	33.4119	22.8199	0.536332	-83	67502.4
2014	5	108.25	21.33	9.97635	-0.0404626	32.3103	28.1838	1.61432	-11	19320.6
2014	5	108.75	21.33	0	0.0105614	32.5588	28.8556	1.67602	-17	30228.2
2014	5	109.05	21.33	0	0.0431978	32.3758	29.0826	2.17578	-11	11520
2014	5	108.5	21	0.504895	-0.0164189	32.6434	28.4972	0.85338	-34	61561.8
2014	5	109	21	0	0.0212728	32.7583	29.1341	1.15967	-22	10269.4
2014	5	109.5	21	3.55296	0.0450407	32.5657	29.844	2.91348	-12	18586.3
2014	5	108.25	20.67	6.73193	-0.021985	32.5522	27.9174	0.614932	-40	56416.9
2014	5	108.75	20.58	58.7174	-0.0039234	32.7141	29.0684	0.355458	-42	60764.7
2014	5	109.2	20.67	0.126224	0.017358	32.7834	29.2684	1.35276	-19	40225.7
2014	5	108.25	20.22	140.576	-0.0145723	32.4748	28.0524	0.321761	-50	95427.6
2014	5	108.67	20.13	32.1154	-0.007106	32.5739	28.6391	0.235645	-50	63205.5
2014	5	109.17	20.25	1.07524	0.0116073	32.6907	28.6815	1.23337	-19	38942.9
2014	5	107.75	19.82	31.8391	-0.0511306	32.5535	28.1617	0.293016	-43	109536
2014	5	108.1	19.75	6.07744	-0.0261447	32.6108	28.7662	0.197948	-51	74059.8
2014	5	108.67	19.75	3.50621	-0.0131894	32.6801	28.9895	0.212342	-60	37499.3
2014	5	108.83	19.75	3.78671	-0.0106523	32.7817	29.0118	0.23509	-45	25235.8
2014	5	107.2	19.25	3.34727	-0.10161	32.6211	28.4698	0.206771	-57	127213
2014	5	107.72	19.25	0.383346	-0.0797168	32.8835	28.5878	0.190955	-68	94842.1
2014	5	108.22	19.25	0	-0.0513908	32.8339	28.8917	0.973124	-37	42310.4
2014	5	107.2	18.75	0.584369	-0.118292	32.7595	29.1128	0.198944	-69	106501
2014	5	107.78	18.8	0	-0.105176	33.0982	28.9787	0.174967	-67	89112
2014	5	108.15	18.8	0	-0.0930898	33.0739	28.8615	0.273222	-45	50242.8
2014	5	107.3	18.27	0.584369	-0.129596	32.813	29.9595	0.210002	-65	89386.6
2014	5	107.78	18.27	0.696568	-0.129007	33.1329	29.1365	0.182418	-75	99156.1
2014	5	108.1	18.27	0	-0.125693	33.2807	29.088	0.183896	-83	67502.4
2014	8	108.25	21.33	0.107524	-0.10039	32.2951	30.8288	1.42008	-11	19320.6
2014	8	108.75	21.33	0	-0.0201337	32.1501	30.6215	1.85066	-17	30228.2
2014	8	109.05	21.33	0	0.0174527	31.7938	30.8832	2.77905	-11	11520
2014	8	108.5	21	0	-0.064441	32.4366	30.7268	0.509045	-34	61561.8
2014	8	109	21	0	0.0009783	32.3096	30.4718	1.30377	-22	10269.4
2014	8	109.5	21	0	0.020994	31.8893	31.2331	2.7721	-12	18586.3
2014	8	108.25	20.67	0.841491	-0.0917212	32.3798	30.1202	0.371353	-40	56416.9
2014	8	108.75	20.58	17.3779	-0.0443321	32.3023	30.2642	0.343598	-42	60764.7
2014	8	109.2	20.67	0	-0.0081948	32.2455	30.7708	1.99144	-19	40225.7
2014	8	108.25	20.22	140.576	-0.082798	32.4575	30.4023	0.270386	-50	95427.6
2014	8	108.67	20.13	14.055	-0.0615464	32.4815	30.7217	0.379455	-50	63205.5
2014	8	109.17	20.25	0	-0.0300904	32.273	31.0133	1.79483	-19	38942.9
2014	8	107.75	19.82	7.74172	-0.0947032	32.6635	30.5212	0.283059	-43	109536
2014	8	108.1	19.75	0	-0.0923262	32.5826	30.2226	0.294836	-51	74059.8
2014	8	108.67	19.75	63.5326	-0.0771717	32.4374	30.6938	0.305846	-60	37499.3
2014	8	108.83	19.75	77.4639	-0.0696902	32.3622	30.6782	0.434758	-45	25235.8
2014	8	107.2	19.25	168.298	-0.169302	33.2764	30.3327	0.294497	-57	127213
2014	8	107.72	19.25	513.646	-0.127886	33.0744	30.5623	0.273605	-68	94842.1
2014	8	108.22	19.25	77.4639	-0.108252	32.5582	29.9519	0.430465	-37	42310.4
2014	8	107.2	18.75	699.312	-0.185097	33.3965	30.2774	0.282972	-69	106501
2014	8	107.78	18.8	989.589	-0.153278	33.2991	30.2146	0.225109	-67	89112
2014	8	108.15	18.8	91.1615	-0.121435	33.0858	30.0061	0.250947	-45	50242.8
2014	8	107.3	18.27	841.874	-0.191124	33.4352	30.4056	0.324747	-65	89386.6
2014	8	107.78	18.27	766.514	-0.173474	33.4825	30.1061	0.26046	-75	99156.1
2014	8	108.1	18.27	152.6	-0.151989	33.4957	29.9984	0.204525	-83	67502.4

## Sheet: SLA
Year	Month	Lon	Lat	SLA
2013	11	108.25	21.33	0.176035
2013	11	108.75	21.33	0.240479
2013	11	109.05	21.33	0.280945
2013	11	108.5	21	0.207443
2013	11	109	21	0.274327
2013	11	109.5	21	0.30825
2013	11	108.25	20.67	0.185397
2013	11	108.75	20.58	0.238212
2013	11	109.2	20.67	0.285417
2013	11	108.25	20.22	0.192115
2013	11	108.67	20.13	0.215766
2013	11	109.17	20.25	0.272413
2013	11	107.75	19.82	0.184861
2013	11	108.1	19.75	0.191409
2013	11	108.67	19.75	0.201647
2013	11	108.83	19.75	0.211684
2013	11	107.2	19.25	0.170821
2013	11	107.72	19.25	0.174579
2013	11	108.22	19.25	0.194808
2013	11	107.2	18.75	0.189347
2013	11	107.78	18.8	0.171211
2013	11	108.15	18.8	0.190726
2013	11	107.3	18.27	0.201641
2013	11	107.78	18.27	0.186674
2013	11	108.1	18.27	0.195296
2014	2	108.25	21.33	0.0676849
2014	2	108.75	21.33	0.118739
2014	2	109.05	21.33	0.14147
2014	2	108.5	21	0.0835505
2014	2	109	21	0.121511
2014	2	109.5	21	0.139313
2014	2	108.25	20.67	0.0601994
2014	2	108.75	20.58	0.0894713
2014	2	109.2	20.67	0.10776
2014	2	108.25	20.22	0.0498787
2014	2	108.67	20.13	0.0707774
2014	2	109.17	20.25	0.0852979
2014	2	107.75	19.82	0.0417975
2014	2	108.1	19.75	0.0386259
2014	2	108.67	19.75	0.0627703
2014	2	108.83	19.75	0.067207
2014	2	107.2	19.25	0.0516075
2014	2	107.72	19.25	0.0439887
2014	2	108.22	19.25	0.0357465
2014	2	107.2	18.75	0.0597491
2014	2	107.78	18.8	0.0461225
2014	2	108.15	18.8	0.0367744
2014	2	107.3	18.27	0.06174
2014	2	107.78	18.27	0.050014
2014	2	108.1	18.27	0.0373103
2014	5	108.25	21.33	-0.0404626
2014	5	108.75	21.33	0.0105614
2014	5	109.05	21.33	0.0431978
2014	5	108.5	21	-0.0164189
2014	5	109	21	0.0212728
2014	5	109.5	21	0.0450407
2014	5	108.25	20.67	-0.021985
2014	5	108.75	20.58	-0.0039234
2014	5	109.2	20.67	0.017358
2014	5	108.25	20.22	-0.0145723
2014	5	108.67	20.13	-0.007106
2014	5	109.17	20.25	0.0116073
2014	5	107.75	19.82	-0.0511306
2014	5	108.1	19.75	-0.0261447
2014	5	108.67	19.75	-0.0131894
2014	5	108.83	19.75	-0.0106523
2014	5	107.2	19.25	-0.10161
2014	5	107.72	19.25	-0.0797168
2014	5	108.22	19.25	-0.0513908
2014	5	107.2	18.75	-0.118292
2014	5	107.78	18.8	-0.105176
2014	5	108.15	18.8	-0.0930898
2014	5	107.3	18.27	-0.129596
2014	5	107.78	18.27	-0.129007
2014	5	108.1	18.27	-0.125693
2014	8	108.25	21.33	-0.10039
2014	8	108.75	21.33	-0.0201337
2014	8	109.05	21.33	0.0174527
2014	8	108.5	21	-0.064441
2014	8	109	21	0.0009783
2014	8	109.5	21	0.020994
2014	8	108.25	20.67	-0.0917212
2014	8	108.75	20.58	-0.0443321
2014	8	109.2	20.67	-0.0081948
2014	8	108.25	20.22	-0.082798
2014	8	108.67	20.13	-0.0615464
2014	8	109.17	20.25	-0.0300904
2014	8	107.75	19.82	-0.0947032
2014	8	108.1	19.75	-0.0923262
2014	8	108.67	19.75	-0.0771717
2014	8	108.83	19.75	-0.0696902
2014	8	107.2	19.25	-0.169302
2014	8	107.72	19.25	-0.127886
2014	8	108.22	19.25	-0.108252
2014	8	107.2	18.75	-0.185097
2014	8	107.78	18.8	-0.153278
2014	8	108.15	18.8	-0.121435
2014	8	107.3	18.27	-0.191124
2014	8	107.78	18.27	-0.173474
2014	8	108.1	18.27	-0.151989

## Sheet: SSS
Year	Month	Lon	Lat	SSS
2013	11	108.25	21.33	30.6142
2013	11	108.75	21.33	30.4582
2013	11	109.05	21.33	30.3956
2013	11	108.5	21	30.8466
2013	11	109	21	30.4068
2013	11	109.5	21	30.6457
2013	11	108.25	20.67	31.2179
2013	11	108.75	20.58	30.6237
2013	11	109.2	20.67	30.3812
2013	11	108.25	20.22	31.2361
2013	11	108.67	20.13	31.2344
2013	11	109.17	20.25	31.3657
2013	11	107.75	19.82	32.8057
2013	11	108.1	19.75	32.3237
2013	11	108.67	19.75	31.5151
2013	11	108.83	19.75	31.5659
2013	11	107.2	19.25	33.1967
2013	11	107.72	19.25	33.1288
2013	11	108.22	19.25	32.33
2013	11	107.2	18.75	33.2298
2013	11	107.78	18.8	33.1423
2013	11	108.15	18.8	32.9546
2013	11	107.3	18.27	33.2422
2013	11	107.78	18.27	33.2362
2013	11	108.1	18.27	33.1757
2014	2	108.25	21.33	31.839
2014	2	108.75	21.33	31.8242
2014	2	109.05	21.33	31.7815
2014	2	108.5	21	32.0088
2014	2	109	21	31.8947
2014	2	109.5	21	31.7697
2014	2	108.25	20.67	32.3254
2014	2	108.75	20.58	32.5174
2014	2	109.2	20.67	32.1175
2014	2	108.25	20.22	32.6984
2014	2	108.67	20.13	32.6112
2014	2	109.17	20.25	32.4824
2014	2	107.75	19.82	33.0868
2014	2	108.1	19.75	32.9622
2014	2	108.67	19.75	32.7593
2014	2	108.83	19.75	32.7889
2014	2	107.2	19.25	33.4628
2014	2	107.72	19.25	33.4202
2014	2	108.22	19.25	32.9701
2014	2	107.2	18.75	33.1317
2014	2	107.78	18.8	33.4176
2014	2	108.15	18.8	33.233
2014	2	107.3	18.27	32.7882
2014	2	107.78	18.27	33.322
2014	2	108.1	18.27	33.4119
2014	5	108.25	21.33	32.3103
2014	5	108.75	21.33	32.5588
2014	5	109.05	21.33	32.3758
2014	5	108.5	21	32.6434
2014	5	109	21	32.7583
2014	5	109.5	21	32.5657
2014	5	108.25	20.67	32.5522
2014	5	108.75	20.58	32.7141
2014	5	109.2	20.67	32.7834
2014	5	108.25	20.22	32.4748
2014	5	108.67	20.13	32.5739
2014	5	109.17	20.25	32.6907
2014	5	107.75	19.82	32.5535
2014	5	108.1	19.75	32.6108
2014	5	108.67	19.75	32.6801
2014	5	108.83	19.75	32.7817
2014	5	107.2	19.25	32.6211
2014	5	107.72	19.25	32.8835
2014	5	108.22	19.25	32.8339
2014	5	107.2	18.75	32.7595
2014	5	107.78	18.8	33.0982
2014	5	108.15	18.8	33.0739
2014	5	107.3	18.27	32.813
2014	5	107.78	18.27	33.1329
2014	5	108.1	18.27	33.2807
2014	8	108.25	21.33	32.2951
2014	8	108.75	21.33	32.1501
2014	8	109.05	21.33	31.7938
2014	8	108.5	21	32.4366
2014	8	109	21	32.3096
2014	8	109.5	21	31.8893
2014	8	108.25	20.67	32.3798
2014	8	108.75	20.58	32.3023
2014	8	109.2	20.67	32.2455
2014	8	108.25	20.22	32.4575
2014	8	108.67	20.13	32.4815
2014	8	109.17	20.25	32.273
2014	8	107.75	19.82	32.6635
2014	8	108.1	19.75	32.5826
2014	8	108.67	19.75	32.4374
2014	8	108.83	19.75	32.3622
2014	8	107.2	19.25	33.2764
2014	8	107.72	19.25	33.0744
2014	8	108.22	19.25	32.5582
2014	8	107.2	18.75	33.3965
2014	8	107.78	18.8	33.2991
2014	8	108.15	18.8	33.0858
2014	8	107.3	18.27	33.4352
2014	8	107.78	18.27	33.4825
2014	8	108.1	18.27	33.4957

## Sheet: SST
Year	Month	Lon	Lat	SST
2013	11	108.25	21.33	22.9349
2013	11	108.75	21.33	22.9762
2013	11	109.05	21.33	23.2585
2013	11	108.5	21	24.0797
2013	11	109	21	24.1521
2013	11	109.5	21	23.6344
2013	11	108.25	20.67	24.4354
2013	11	108.75	20.58	24.6315
2013	11	109.2	20.67	24.201
2013	11	108.25	20.22	24.9056
2013	11	108.67	20.13	25.0005
2013	11	109.17	20.25	24.6866
2013	11	107.75	19.82	25.255
2013	11	108.1	19.75	25.1498
2013	11	108.67	19.75	25.2038
2013	11	108.83	19.75	24.9498
2013	11	107.2	19.25	25.5409
2013	11	107.72	19.25	26.1222
2013	11	108.22	19.25	25.9645
2013	11	107.2	18.75	26.1183
2013	11	107.78	18.8	26.9034
2013	11	108.15	18.8	26.7972
2013	11	107.3	18.27	26.2641
2013	11	107.78	18.27	26.6375
2013	11	108.1	18.27	26.595
2014	2	108.25	21.33	15.923
2014	2	108.75	21.33	17.8587
2014	2	109.05	21.33	18.3294
2014	2	108.5	21	19.087
2014	2	109	21	18.9378
2014	2	109.5	21	18.2057
2014	2	108.25	20.67	19.6116
2014	2	108.75	20.58	19.7851
2014	2	109.2	20.67	19.1597
2014	2	108.25	20.22	19.922
2014	2	108.67	20.13	20.1326
2014	2	109.17	20.25	19.2918
2014	2	107.75	19.82	20.6049
2014	2	108.1	19.75	20.9229
2014	2	108.67	19.75	20.6527
2014	2	108.83	19.75	20.0534
2014	2	107.2	19.25	20.6048
2014	2	107.72	19.25	21.6526
2014	2	108.22	19.25	22.1891
2014	2	107.2	18.75	21.1005
2014	2	107.78	18.8	22.3662
2014	2	108.15	18.8	22.3616
2014	2	107.3	18.27	22.1709
2014	2	107.78	18.27	22.4578
2014	2	108.1	18.27	22.8199
2014	5	108.25	21.33	28.1838
2014	5	108.75	21.33	28.8556
2014	5	109.05	21.33	29.0826
2014	5	108.5	21	28.4972
2014	5	109	21	29.1341
2014	5	109.5	21	29.844
2014	5	108.25	20.67	27.9174
2014	5	108.75	20.58	29.0684
2014	5	109.2	20.67	29.2684
2014	5	108.25	20.22	28.0524
2014	5	108.67	20.13	28.6391
2014	5	109.17	20.25	28.6815
2014	5	107.75	19.82	28.1617
2014	5	108.1	19.75	28.7662
2014	5	108.67	19.75	28.9895
2014	5	108.83	19.75	29.0118
2014	5	107.2	19.25	28.4698
2014	5	107.72	19.25	28.5878
2014	5	108.22	19.25	28.8917
2014	5	107.2	18.75	29.1128
2014	5	107.78	18.8	28.9787
2014	5	108.15	18.8	28.8615
2014	5	107.3	18.27	29.9595
2014	5	107.78	18.27	29.1365
2014	5	108.1	18.27	29.088
2014	8	108.25	21.33	30.8288
2014	8	108.75	21.33	30.6215
2014	8	109.05	21.33	30.8832
2014	8	108.5	21	30.7268
2014	8	109	21	30.4718
2014	8	109.5	21	31.2331
2014	8	108.25	20.67	30.1202
2014	8	108.75	20.58	30.2642
2014	8	109.2	20.67	30.7708
2014	8	108.25	20.22	30.4023
2014	8	108.67	20.13	30.7217
2014	8	109.17	20.25	31.0133
2014	8	107.75	19.82	30.5212
2014	8	108.1	19.75	30.2226
2014	8	108.67	19.75	30.6938
2014	8	108.83	19.75	30.6782
2014	8	107.2	19.25	30.3327
2014	8	107.72	19.25	30.5623
2014	8	108.22	19.25	29.9519
2014	8	107.2	18.75	30.2774
2014	8	107.78	18.8	30.2146
2014	8	108.15	18.8	30.0061
2014	8	107.3	18.27	30.4056
2014	8	107.78	18.27	30.1061
2014	8	108.1	18.27	29.9984

## Sheet: Chla
Year	Month	Lon	Lat	Chla
2013	11	108.25	21.33	2.3688
2013	11	108.75	21.33	4.70726
2013	11	109.05	21.33	5.30898
2013	11	108.5	21	1.36207
2013	11	109	21	3.98755
2013	11	109.5	21	3.66509
2013	11	108.25	20.67	1.00688
2013	11	108.75	20.58	1.35031
2013	11	109.2	20.67	3.08547
2013	11	108.25	20.22	1.28454
2013	11	108.67	20.13	1.25672
2013	11	109.17	20.25	2.58047
2013	11	107.75	19.82	0.820722
2013	11	108.1	19.75	1.02117
2013	11	108.67	19.75	1.40203
2013	11	108.83	19.75	1.39157
2013	11	107.2	19.25	0.240414
2013	11	107.72	19.25	0.227878
2013	11	108.22	19.25	2.07215
2013	11	107.2	18.75	0.40186
2013	11	107.78	18.8	0.698765
2013	11	108.15	18.8	1.7907
2013	11	107.3	18.27	0.164578
2013	11	107.78	18.27	0.205141
2013	11	108.1	18.27	0.334654
2014	2	108.25	21.33	1.73138
2014	2	108.75	21.33	1.76054
2014	2	109.05	21.33	1.82028
2014	2	108.5	21	0.869352
2014	2	109	21	1.78986
2014	2	109.5	21	3.13219
2014	2	108.25	20.67	0.789009
2014	2	108.75	20.58	0.667785
2014	2	109.2	20.67	2.71357
2014	2	108.25	20.22	0.370123
2014	2	108.67	20.13	0.447154
2014	2	109.17	20.25	3.38496
2014	2	107.75	19.82	0.442368
2014	2	108.1	19.75	0.439887
2014	2	108.67	19.75	0.469478
2014	2	108.83	19.75	0.817281
2014	2	107.2	19.25	0.40193
2014	2	107.72	19.25	0.471703
2014	2	108.22	19.25	0.941403
2014	2	107.2	18.75	0.389131
2014	2	107.78	18.8	0.565426
2014	2	108.15	18.8	1.09675
2014	2	107.3	18.27	0.474179
2014	2	107.78	18.27	0.816221
2014	2	108.1	18.27	0.536332
2014	5	108.25	21.33	1.61432
2014	5	108.75	21.33	1.67602
2014	5	109.05	21.33	2.17578
2014	5	108.5	21	0.85338
2014	5	109	21	1.15967
2014	5	109.5	21	2.91348
2014	5	108.25	20.67	0.614932
2014	5	108.75	20.58	0.355458
2014	5	109.2	20.67	1.35276
2014	5	108.25	20.22	0.321761
2014	5	108.67	20.13	0.235645
2014	5	109.17	20.25	1.23337
2014	5	107.75	19.82	0.293016
2014	5	108.1	19.75	0.197948
2014	5	108.67	19.75	0.212342
2014	5	108.83	19.75	0.23509
2014	5	107.2	19.25	0.206771
2014	5	107.72	19.25	0.190955
2014	5	108.22	19.25	0.973124
2014	5	107.2	18.75	0.198944
2014	5	107.78	18.8	0.174967
2014	5	108.15	18.8	0.273222
2014	5	107.3	18.27	0.210002
2014	5	107.78	18.27	0.182418
2014	5	108.1	18.27	0.183896
2014	8	108.25	21.33	1.42008
2014	8	108.75	21.33	1.85066
2014	8	109.05	21.33	2.77905
2014	8	108.5	21	0.509045
2014	8	109	21	1.30377
2014	8	109.5	21	2.7721
2014	8	108.25	20.67	0.371353
2014	8	108.75	20.58	0.343598
2014	8	109.2	20.67	1.99144
2014	8	108.25	20.22	0.270386
2014	8	108.67	20.13	0.379455
2014	8	109.17	20.25	1.79483
2014	8	107.75	19.82	0.283059
2014	8	108.1	19.75	0.294836
2014	8	108.67	19.75	0.305846
2014	8	108.83	19.75	0.434758
2014	8	107.2	19.25	0.294497
2014	8	107.72	19.25	0.273605
2014	8	108.22	19.25	0.430465
2014	8	107.2	18.75	0.282972
2014	8	107.78	18.8	0.225109
2014	8	108.15	18.8	0.250947
2014	8	107.3	18.27	0.324747
2014	8	107.78	18.27	0.26046
2014	8	108.1	18.27	0.204525

## Sheet: Depth
Year	Month	Lon	Lat	Depth
2013	11	108.25	21.33	-11
2013	11	108.75	21.33	-17
2013	11	109.05	21.33	-11
2013	11	108.5	21	-34
2013	11	109	21	-22
2013	11	109.5	21	-12
2013	11	108.25	20.67	-40
2013	11	108.75	20.58	-42
2013	11	109.2	20.67	-19
2013	11	108.25	20.22	-50
2013	11	108.67	20.13	-50
2013	11	109.17	20.25	-19
2013	11	107.75	19.82	-43
2013	11	108.1	19.75	-51
2013	11	108.67	19.75	-60
2013	11	108.83	19.75	-45
2013	11	107.2	19.25	-57
2013	11	107.72	19.25	-68
2013	11	108.22	19.25	-37
2013	11	107.2	18.75	-69
2013	11	107.78	18.8	-67
2013	11	108.15	18.8	-45
2013	11	107.3	18.27	-65
2013	11	107.78	18.27	-75
2013	11	108.1	18.27	-83
2014	2	108.25	21.33	-11
2014	2	108.75	21.33	-17
2014	2	109.05	21.33	-11
2014	2	108.5	21	-34
2014	2	109	21	-22
2014	2	109.5	21	-12
2014	2	108.25	20.67	-40
2014	2	108.75	20.58	-42
2014	2	109.2	20.67	-19
2014	2	108.25	20.22	-50
2014	2	108.67	20.13	-50
2014	2	109.17	20.25	-19
2014	2	107.75	19.82	-43
2014	2	108.1	19.75	-51
2014	2	108.67	19.75	-60
2014	2	108.83	19.75	-45
2014	2	107.2	19.25	-57
2014	2	107.72	19.25	-68
2014	2	108.22	19.25	-37
2014	2	107.2	18.75	-69
2014	2	107.78	18.8	-67
2014	2	108.15	18.8	-45
2014	2	107.3	18.27	-65
2014	2	107.78	18.27	-75
2014	2	108.1	18.27	-83
2014	5	108.25	21.33	-11
2014	5	108.75	21.33	-17
2014	5	109.05	21.33	-11
2014	5	108.5	21	-34
2014	5	109	21	-22
2014	5	109.5	21	-12
2014	5	108.25	20.67	-40
2014	5	108.75	20.58	-42
2014	5	109.2	20.67	-19
2014	5	108.25	20.22	-50
2014	5	108.67	20.13	-50
2014	5	109.17	20.25	-19
2014	5	107.75	19.82	-43
2014	5	108.1	19.75	-51
2014	5	108.67	19.75	-60
2014	5	108.83	19.75	-45
2014	5	107.2	19.25	-57
2014	5	107.72	19.25	-68
2014	5	108.22	19.25	-37
2014	5	107.2	18.75	-69
2014	5	107.78	18.8	-67
2014	5	108.15	18.8	-45
2014	5	107.3	18.27	-65
2014	5	107.78	18.27	-75
2014	5	108.1	18.27	-83
2014	8	108.25	21.33	-11
2014	8	108.75	21.33	-17
2014	8	109.05	21.33	-11
2014	8	108.5	21	-34
2014	8	109	21	-22
2014	8	109.5	21	-12
2014	8	108.25	20.67	-40
2014	8	108.75	20.58	-42
2014	8	109.2	20.67	-19
2014	8	108.25	20.22	-50
2014	8	108.67	20.13	-50
2014	8	109.17	20.25	-19
2014	8	107.75	19.82	-43
2014	8	108.1	19.75	-51
2014	8	108.67	19.75	-60
2014	8	108.83	19.75	-45
2014	8	107.2	19.25	-57
2014	8	107.72	19.25	-68
2014	8	108.22	19.25	-37
2014	8	107.2	18.75	-69
2014	8	107.78	18.8	-67
2014	8	108.15	18.8	-45
2014	8	107.3	18.27	-65
2014	8	107.78	18.27	-75
2014	8	108.1	18.27	-83

## Sheet: Distance
Year	Month	Lon	Lat	Distance
2013	11	108.25	21.33	19320.6
2013	11	108.75	21.33	30228.2
2013	11	109.05	21.33	11520
2013	11	108.5	21	61561.8
2013	11	109	21	10269.4
2013	11	109.5	21	18586.3
2013	11	108.25	20.67	56416.9
2013	11	108.75	20.58	60764.7
2013	11	109.2	20.67	40225.7
2013	11	108.25	20.22	95427.6
2013	11	108.67	20.13	63205.5
2013	11	109.17	20.25	38942.9
2013	11	107.75	19.82	109536
2013	11	108.1	19.75	74059.8
2013	11	108.67	19.75	37499.3
2013	11	108.83	19.75	25235.8
2013	11	107.2	19.25	127213
2013	11	107.72	19.25	94842.1
2013	11	108.22	19.25	42310.4
2013	11	107.2	18.75	106501
2013	11	107.78	18.8	89112
2013	11	108.15	18.8	50242.8
2013	11	107.3	18.27	89386.6
2013	11	107.78	18.27	99156.1
2013	11	108.1	18.27	67502.4
2014	2	108.25	21.33	19320.6
2014	2	108.75	21.33	30228.2
2014	2	109.05	21.33	11520
2014	2	108.5	21	61561.8
2014	2	109	21	10269.4
2014	2	109.5	21	18586.3
2014	2	108.25	20.67	56416.9
2014	2	108.75	20.58	60764.7
2014	2	109.2	20.67	40225.7
2014	2	108.25	20.22	95427.6
2014	2	108.67	20.13	63205.5
2014	2	109.17	20.25	38942.9
2014	2	107.75	19.82	109536
2014	2	108.1	19.75	74059.8
2014	2	108.67	19.75	37499.3
2014	2	108.83	19.75	25235.8
2014	2	107.2	19.25	127213
2014	2	107.72	19.25	94842.1
2014	2	108.22	19.25	42310.4
2014	2	107.2	18.75	106501
2014	2	107.78	18.8	89112
2014	2	108.15	18.8	50242.8
2014	2	107.3	18.27	89386.6
2014	2	107.78	18.27	99156.1
2014	2	108.1	18.27	67502.4
2014	5	108.25	21.33	19320.6
2014	5	108.75	21.33	30228.2
2014	5	109.05	21.33	11520
2014	5	108.5	21	61561.8
2014	5	109	21	10269.4
2014	5	109.5	21	18586.3
2014	5	108.25	20.67	56416.9
2014	5	108.75	20.58	60764.7
2014	5	109.2	20.67	40225.7
2014	5	108.25	20.22	95427.6
2014	5	108.67	20.13	63205.5
2014	5	109.17	20.25	38942.9
2014	5	107.75	19.82	109536
2014	5	108.1	19.75	74059.8
2014	5	108.67	19.75	37499.3
2014	5	108.83	19.75	25235.8
2014	5	107.2	19.25	127213
2014	5	107.72	19.25	94842.1
2014	5	108.22	19.25	42310.4
2014	5	107.2	18.75	106501
2014	5	107.78	18.8	89112
2014	5	108.15	18.8	50242.8
2014	5	107.3	18.27	89386.6
2014	5	107.78	18.27	99156.1
2014	5	108.1	18.27	67502.4
2014	8	108.25	21.33	19320.6
2014	8	108.75	21.33	30228.2
2014	8	109.05	21.33	11520
2014	8	108.5	21	61561.8
2014	8	109	21	10269.4
2014	8	109.5	21	18586.3
2014	8	108.25	20.67	56416.9
2014	8	108.75	20.58	60764.7
2014	8	109.2	20.67	40225.7
2014	8	108.25	20.22	95427.6
2014	8	108.67	20.13	63205.5
2014	8	109.17	20.25	38942.9
2014	8	107.75	19.82	109536
2014	8	108.1	19.75	74059.8
2014	8	108.67	19.75	37499.3
2014	8	108.83	19.75	25235.8
2014	8	107.2	19.25	127213
2014	8	107.72	19.25	94842.1
2014	8	108.22	19.25	42310.4
2014	8	107.2	18.75	106501
2014	8	107.78	18.8	89112
2014	8	108.15	18.8	50242.8
2014	8	107.3	18.27	89386.6
2014	8	107.78	18.27	99156.1
2014	8	108.1	18.27	67502.4
